# Supplementary material for: In Silico Analysis of Putative Sugar Transporter Genes in Aspergillus niger Using Phylogeny and Comparative Transcriptomics
Source: PubMed Central journal article supplement (PMC5968117; doi:10.3389/fmicb.2018.01045), 2018-05-18

Additional File 3: Sequence logos for each sugar transporter family and important motifs are highlighted above.

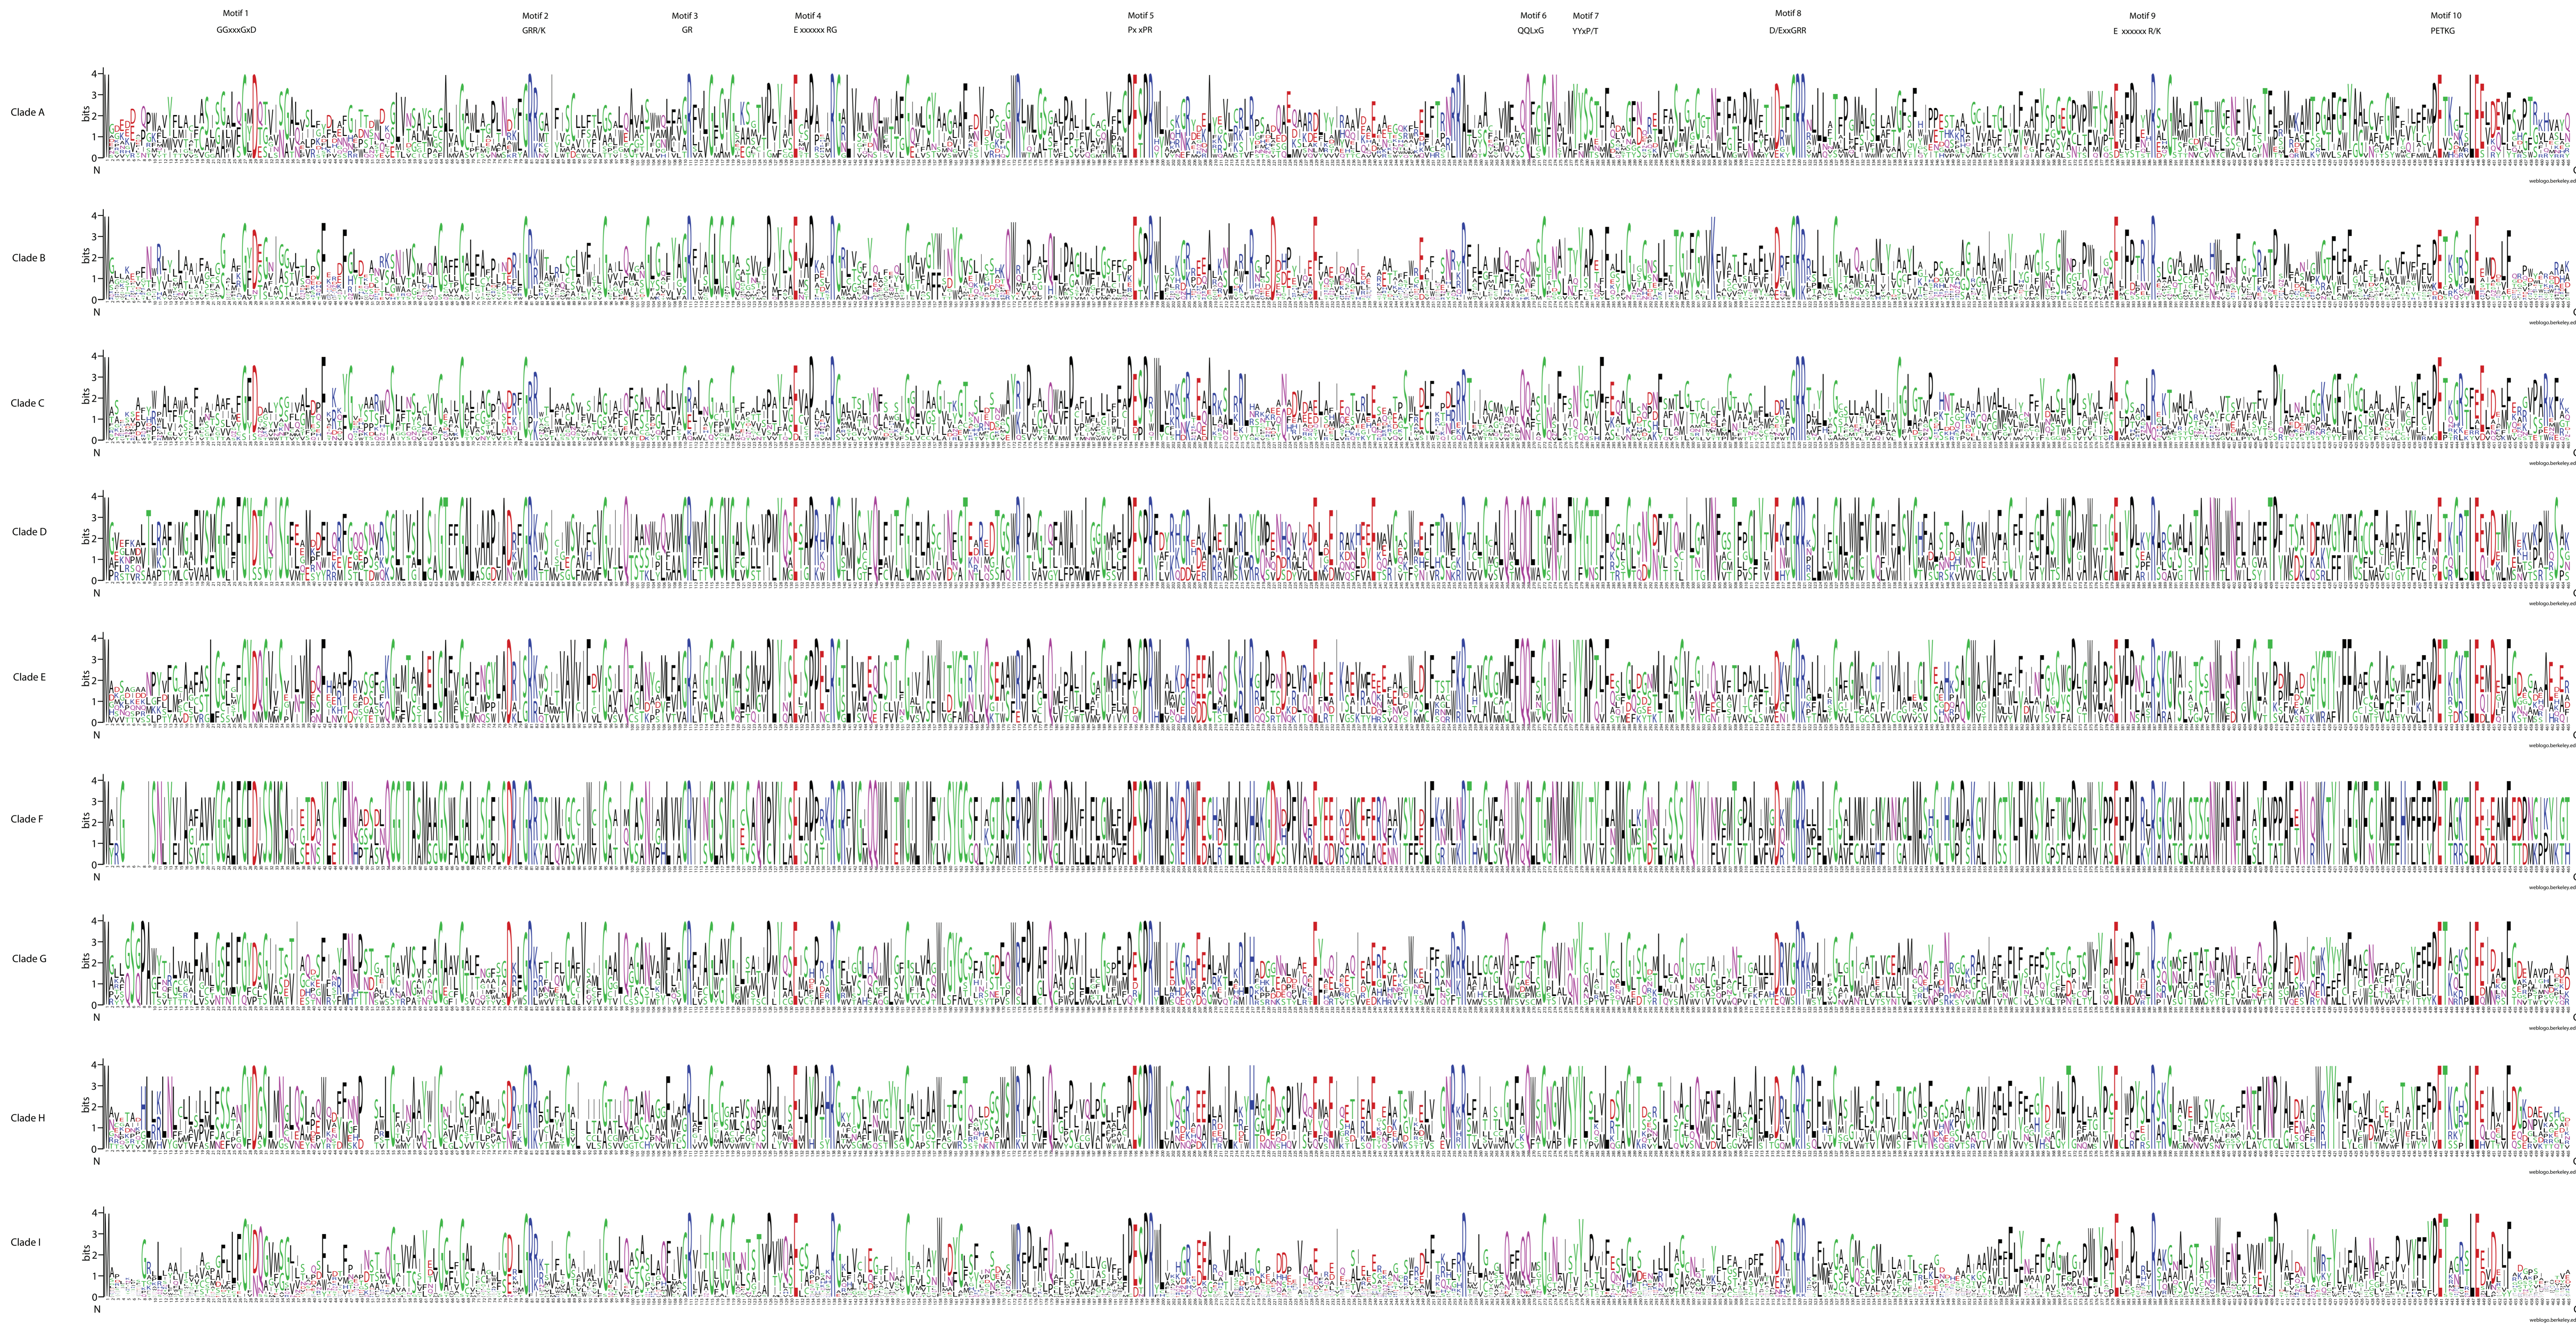

Supplement: Data_Sheet_3.pdf [file Data_Sheet_3.pdf]
