# Supplementary material for: In Silico Analysis of Putative Sugar Transporter Genes in Aspergillus niger Using Phylogeny and Comparative Transcriptomics
Source: Front Microbiol. 2018 May 18;9:1045. doi: 10.3389/fmicb.2018.01045 (PMC5968117; doi:10.3389/fmicb.2018.01045)
Supplement: Supplementary file 4 [file Data_Sheet_4.xls]

## Sheet: Description
Supplementary File 4: Fungal culture conditions and gene expression values.
A: Culture conditions
B: Gene expression values

## Sheet: SF 4A Culture conditions
Supplementary File 4A: Culture conditions.
The A. niger strains were grown at 30°C on complete medium (CM) with 1.5% agar to generate spore plates. Liquid cultures were incubated on a rotary shaker at 250 rpm. Pre-cultures for RNA isolation were incubated for 16 h in 1 L Erlenmeyer flasks that contained 250 mL CM supplemented with 2% D-fructose.
Mycelium was washed with minimal medium (MM) and 1 g (wet weight) aliquots were transferred for 2 h to 250 mL Erlenmeyer flasks containing 50 ml MM supplemented with 25 mM mono- or disaccharide, or 1% polysaccharide.
The only exceptions were D-maltose cultures of N402 and ∆amyR strains that were incubated for 4 h and for which 1% maltose was used as a carbon source. All carbon sources are listed in below table.
Mycelium was harvested by vacuum filtration, dried between towels and frozen in liquid nitrogen. All cultures were performed as biological duplicates.
Carbon sources	Abbreviations	Growth time
D-galacturonic acid	GalA	2 hour
L-rhamnose	Rha	2 hour
D-galactose	Gal	2 hour
D-xylose	Xyl	2 hour
L-arabinose	Ara	2 hour
sucrose	Suc	2 hour
maltose	Malt	4 hour
D-fructose	Frc	2 hour
D-glucose	Glc	2 hour
D-mannose	Man	2 hour
cellulose	Cel	2 hour
Rhamnogalacturonan	RGl	2 hour
apple pectin	Apple.pectin	2 hour
guar gum	GG	2 hour
sugar beet pulp	SBP	2 hour
polygalacturonic acid	PGA	2 hour
mannan	MNN	2 hour
arabinan	ABN	2 hour
galactan	GLN	2 hour
inulin	Inu	2 hour
xyloglucan	XG	2 hour
beech xylan	Bex	2 hour

## Sheet: SF 4B Gene expression values
Supplementary File 4B: Gene expression values.
Gene IDs		Mono-/di- saccharide																					Polysaccharide																								Transcriptinal factor mutants
AspGD ids	JGI Mycocosm database ids	Rha.2h	Rha.2h.1	GalA.2h	GalA.2h.1	Gal.2h	Gal.2h.1	Xyl.2h	Xyl.2h.1	Ara.2h	Ara.2h.1	Ara.2h.2	Suc.2h	Suc.2h.1	Malt.4h.1	Malt.4	Frc.2h	Frc.2h.1	Glc.2h	Glc.2h.1	Man.2h	Man.2h.1	Cel.2h	Cel.2h.1	Apple.pectin.2h	Apple.pectin.2h.1	BeX.2h	BeX.2h.1	SBP.2h	SBP.2h.1	PGA.2h	PGA.2h.1	MNN.2h	MNN.2h.1	GG.2h	GG.2h.1	ABN.2h.1	ABN.2h	GLN.2h	GLN.2h.1	RGI.2h	RGI.2h.1	Inu.2h	Inu.2h.1	XG.2h	XG.2h.1	dRhaR.rha.2h	dRhaR.rha.2h.1	dGalX.gal.2h
An01g00820	JGI_155141	27.0465	24.6006	27.4707	27.211	28.4135	31.0311	25.9419	25.2982	29.9537	28.2647	31.3727	29.1271	31.2117	34.0466	28.2687	32.4502	38.6445	27.4531	24.8556	31.079	29.6631	21.7263	25.7257	30.262	34.6474	31.0109	25.355	31.2802	38.5303	28.1175	27.2152	25.257	33.9796	24.5732	27.4713	25.8801	24.7855	23.7673	30.6054	29.6797	39.1325	24.743	23.8334	23.7237	22.6954	25.0293	30.7475	20.228
An01g00850	JGI_155144	518.35	423.196	200.085	265.871	1020.98	726.753	45.6262	49.999	349.375	342.807	476.757	62.5436	35.6774	123.122	138.54	80.1266	112.653	50.0859	57.123	39.846	103.033	428.13	366.417	837.586	1025.64	405.338	640.601	447.753	906.489	366.758	415.977	115.896	107.678	2459.91	2357.07	508.878	138.03	358.445	436.111	46.5876	46.9118	408.356	387.122	723.579	698.642	857.884	1755.51	5869.86
An01g08780	JGI_155918	6805.28	7233.74	6013.23	5743.87	3528.14	2601.93	2814.77	2820.72	4408.15	2969.51	3819.17	1600	1905.96	1292.22	1181.04	2734.21	2841.32	3316.02	3323.89	4584.99	4031.26	6407.99	6824.7	3838.43	5238.52	3381.71	6217.89	500.573	1878.73	3677.68	3910.32	4097	4284.82	3157.57	1953.64	3553.02	5933.52	7823.36	6217.04	2481.8	2715.68	5381.38	4399.64	5797.65	6111.63	6816.95	7221.38	4976.11
An01g10970	JGI_156132	106.328	189.445	98.9811	103.746	117.29	108.802	132.939	128.445	118.782	118.941	127.92	159.492	143.393	153.096	148.21	184.279	235.964	178.549	163.371	177.744	194.031	121.267	120.793	228.514	261.685	241.95	170.943	204.262	154.885	54.3714	62.668	55.878	97.8817	128.346	112.665	134.891	110.939	87.6988	86.0174	137.874	110.486	247.938	274.784	103.654	99.0864	111.738	117.891	105.277
An01g14620	JGI_156468	5506.14	6470.17	281.329	288.335	34.6296	41.1292	30.6078	37.5374	30.8478	44.0695	37.7153	33.0987	27.0666	35.9485	37.6421	38.575	39.2456	30.3	33.3097	34.2839	38.6433	42.5052	46.2182	44.8646	58.513	49.9244	48.0965	34.9144	34.883	413.348	497.9	46.8986	51.4213	34.1729	46.1416	1004.6	99.8602	52.2381	46.6557	39.6901	33.2921	46.2109	52.9767	55.9477	41.8996	42.3476	50.0188	40.0183
An02g00060	JGI_156531	371.959	774.018	145.736	228.59	55.0238	26.2348	17.8751	19.8275	19.8813	21.2982	19.3494	22.3451	20.8049	25.9579	23.6369	27.2769	27.9335	30.5373	26.6667	21.552	22.9892	39.8049	32.6751	24.8395	39.9531	43.692	49.5558	19.6994	27.8411	31.6692	37.5131	20.8479	19.7051	134.792	77.7719	303.056	42.7381	26.4792	32.9114	22.7952	26.9286	26.0561	17.7217	16.36	16.2717	77.1204	68.8493	128.162
An02g00590	JGI_156584	3998.38	5462.78	2037.52	2420.99	617.597	1787.92	200.988	175.491	2798.34	2865.19	2960.77	57.5528	43.5829	27.204	36.9904	135.798	197.145	107.951	129.525	83.6212	66.7962	3864.5	4928.96	1016.05	1555.4	1654.16	3717.82	200.366	183.03	2952.4	3167.48	3595.93	6316.35	1727.92	772.691	2087.94	3322.71	3713.49	4138.64	153.023	161.777	4402.29	5535.59	4420.27	4380.89	3553.79	4162.29	5479.77
An02g02810	JGI_156808	43.41	43.1708	44.7445	50.9825	41.7646	42.6302	43.0667	38.8555	38.1252	39.734	36.7111	50.6204	34.0221	102.895	88.1907	56.5293	59.4134	50.8838	50.2942	57.01	56.1007	57.9165	49.3748	91.9106	97.466	68.3691	49.8955	79.2676	65.9408	52.7622	36.2554	42.263	49.087	45.1967	46.5343	61.0899	45.6946	38.3343	48.3736	44.0513	42.6092	35.6924	36.7775	34.9531	35.3732	35.7471	30.3231	38.3267
An02g03540	JGI_156877	65.0638	87.7039	112.092	250.743	43.5203	85.8711	173.779	161.507	148.895	148.693	232.242	2704.03	2022.48	3262.74	3454.9	1424.78	1331.32	3081.25	3100.74	1739.06	1444.94	1023.51	93.8986	79.0206	65.4059	126.311	77.2595	387.111	486.269	83.2424	68.7638	69.7034	106.213	118.161	170.344	61.6796	60.6777	67.0805	68.3969	71.1375	82.5476	60.8008	63.2391	70.9152	65.0825	51.1048	67.5694	229.001
An02g07610	JGI_157281	3614.82	3970.53	2122.16	2475.24	3347.27	2888.18	197.767	183.624	2096.14	1455.86	1739.44	66.581	51.7583	56.2858	73.075	399.327	361.178	163.149	198.747	269.281	137.203	3711.89	3999.9	1815.56	2294.58	2575.34	3355.46	407.471	598.087	3208.09	3114.09	5887.39	6706.02	5436.18	5043.56	3419.83	3076.15	5018.93	4665.66	1411.8	2112.06	3978.93	3386.91	4843.26	4290.15	2554.23	3354.65	3133.74
An02g07850	JGI_157305	76.2092	84.1945	59.0813	51.6028	59.3201	54.2639	78.5355	75.1946	50.4999	41.8224	52.7359	67.4945	77.2796	88.245	84.3266	67.5981	75.4501	65.1757	72.1912	69.5124	94.5556	43.3411	50.24	66.8569	54.9818	85.2687	60.4449	89.9826	75.3081	74.8066	72.2728	56.5091	47.5996	75.0268	68.5363	67.6949	67.9724	73.1132	78.5195	89.3408	75.5916	62.8992	58.0014	56.0671	51.742	70.6641	90.9887	56.1642
An02g07880	JGI_157308	22.324	24.2898	22.4982	24.5096	25.6567	23.2526	20.0125	22.9782	20.7206	20.6369	21.7512	23.7079	25.4209	49.0933	43.0704	29.1161	29.4403	29.1955	26.9272	28.2586	33.5104	27.5388	23.6135	28.4937	34.843	34.0254	27.9626	34.5251	32.5239	20.3955	20.7045	23.4547	25.3406	25.0523	26.0181	20.9272	22.8206	20.8088	26.0659	27.9994	32.5906	18.8768	15.4163	16.6769	16.8893	19.6748	18.2109	19.2963
An02g08230	JGI_157342	219.613	377.608	948.843	1061.21	201.796	273.106	262.881	264.258	200.864	166.756	218.628	26.8376	35.5248	33.6217	28.8153	157.759	148.949	47.498	47.5115	155.739	74.1035	561.541	505.169	152.195	253.417	322.416	624.082	31.037	52.2373	839.855	736.387	526.596	658.437	161.496	151.25	299.359	802.452	1456.11	1662.75	91.2148	100.731	552.821	574.796	1297.82	1408.31	209.307	254.477	416.601
An02g08690	JGI_157390	16.5668	16.4281	16.8254	16.4924	19.4296	24.107	18.5684	21.9763	18.8186	20.7298	21.1627	18.8139	18.3413	18.4236	18.3478	19.5632	18.3288	18.6175	17.5528	17.3709	17.0921	21.9637	25.189	23.8134	20.1879	28.9038	26.4126	18.4346	17.7919	22.7819	21.4114	20.2082	24.4754	16.2814	19.315	17.6753	23.3686	22.8025	25.3728	40.2071	43.1711	17.4948	17.536	19.3907	18.1282	20.6008	19.8761	19.4232
An02g11050	JGI_157621	19.1492	18.2994	21.4699	21.1631	20.6691	21.3594	17.7378	17.285	18.7124	16.0141	20.5935	20.2171	20.7504	20.9599	20.078	17.8211	19.2256	23.2641	18.2125	20.9253	22.571	18.1457	17.8561	19.4396	21.1241	22.1906	16.3326	19.6485	24.2567	22.0713	17.1696	19.7873	19.9903	19.7514	22.3456	22.99	23.2325	19.0487	18.9	19.1688	24.02	15.9034	15.4928	16.7747	15.6456	20.1291	16.0461	14.5703
An02g11260	JGI_157642	19.6053	21.7386	16.9527	15.6638	15.294	16.909	16.6656	15.2842	15.2744	13.8369	13.5605	15.8898	15.3019	17.7814	16.1513	15.8857	15.1399	18.4131	17.0469	17.3358	17.5679	14.6003	16.357	15.9515	18.9509	17.5771	21.9267	16.5168	19.9003	17.559	14.2654	14.6015	15.5518	18.2895	18.7881	19.6235	16.3899	16.3632	18.5331	15.8356	17.1629	14.9004	14.8432	13.8736	13.4336	15.389	16.348	14.7737
An03g01620	JGI_158175	60.4446	56.987	3106.59	3043.84	33.3766	56.578	4427.1	4481.91	9527.38	9129.74	9400.19	16.9506	17.8799	18.1993	16.4153	18.2247	20.242	23.6607	20.2621	24.5998	20.6628	85.4266	124.262	3912.54	4668.79	279.815	769.918	767.155	1589.24	7575.87	7089.36	91.1791	82.108	1615.83	788.638	5654.69	9930.45	6574.22	5323.76	110.847	151.613	58.5246	63.0111	414.335	664.102	38.4548	47.6145	138.931
An03g01750	JGI_158188	173.756	287.995	343.737	334.728	60.1537	77.8689	52.791	52.7459	68.7811	51.0454	66.7462	49.226	49.4657	60.609	61.2687	63.548	87.8293	91.1998	89.6899	71.1973	96.0593	278.612	341.17	178.249	201.782	364.502	365.757	50.8169	50.1713	109.405	105.591	255.333	198.958	73.5001	54.0539	101.738	102.402	133.498	148.518	52.1025	63.2804	76.0473	71.3238	71.4666	62.9931	97.5686	76.2748	130.802
An03g02190	JGI_158229	88.8551	51.1202	43.1838	37.9083	33.9498	38.458	62.4123	51.1562	31.2224	33.2294	32.0682	31.7129	30.153	33.1162	29.2038	33.9918	31.1213	27.9038	38.9998	34.1441	36.6035	31.6186	37.0862	29.7728	34.5436	31.4145	30.273	26.2354	32.7684	32.2002	30.1894	64.3758	42.2738	39.6549	33.5218	44.3565	43.6915	59.8094	45.1021	38.1257	52.8583	34.257	36.9508	50.6482	42.004	32.243	28.3763	24.6619
An03g05320	JGI_158524	68.7206	64.1418	57.1473	57.5701	45.8119	54.3811	44.8057	43.4968	35.8649	38.647	40.6573	42.8301	46.7281	42.261	41.8713	42.0819	40.4631	38.8215	42.2945	40.7041	38.655	55.933	67.1743	46.4517	52.747	78.5494	54.6865	35.6992	44.1299	49.6027	49.4274	56.9365	46.0937	40.2292	42.7187	54.4235	58.1904	69.5748	77.0996	48.7658	49.7784	48.6326	57.4694	54.1165	52.6091	50.225	47.9563	48.2608
An04g00340	JGI_158719	204.097	259.688	284.555	238.067	242.999	87.0242	138.123	133.807	199.029	181.975	208.377	138.181	150.27	165.663	169.103	148.841	179.621	89.4762	103.09	147.288	216.177	258.197	320.45	255.419	249.324	385.895	298.018	154.531	182.347	117.525	101.248	133.061	180.693	145.585	191.296	327.617	284.458	343.95	279.305	183.51	150.441	284.196	281.626	305.759	276.558	391.792	406.843	216.073
An04g02790	JGI_158969	21.4931	21.6757	22.0572	19.053	21.784	22.1005	21.4267	21.972	29.0446	26.223	23.604	23.8218	25.5199	26.6607	25.6832	22.568	23.2149	21.1601	23.5158	22.0635	21.4706	20.1518	22.6817	21.9711	20.7653	22.3634	22.9201	21.0898	20.3689	21.5474	28.1552	18.5583	22.8925	21.3119	17.7638	18.0739	22.831	19.5582	22.615	24.4934	22.4343	20.2852	20.8437	22.0394	24.0135	21.327	20.7391	18.2028
An04g08030	JGI_159486	33.8215	29.9998	23.3414	25.404	21.0047	25.1455	26.6972	28.0551	23.1464	21.801	25.1977	23.6976	19.7106	21.6237	21.9358	23.2665	20.0654	25.5931	19.7346	25.4091	23.6782	26.9947	31.04	36.7955	37.3608	31.685	55.0915	23.3422	25.8432	26.2672	26.6056	27.8613	29.9788	25.4145	25.219	26.2911	24.4145	21.854	24.5402	23.8358	26.8936	25.0266	25.0514	25.5559	27.1713	21.9937	19.6136	22.9992
An04g10090	JGI_159690	21.4353	18.0772	17.0878	19.0427	21.1048	13.7764	18.6977	17.4853	19.0242	18.0527	17.5552	15.5614	17.666	18.5849	19.3398	18.5376	19.7638	19.0901	21.4732	18.7107	17.0002	16.8794	17.8296	17.0979	16.9445	20.4724	13.8153	21.2248	20.3931	21.0701	16.5304	21.0683	21.1468	19.0758	22.3655	18.5993	18.7713	19.3271	16.8064	17.7406	17.7578	16.2233	12.4061	13.2825	14.9334	18.2057	15.0197	17.2479
An05g00490	JGI_159769	30.0355	32.8345	32.3989	25.0529	23.0736	28.7741	28.9737	27.5441	36.2719	30.4568	31.0935	31.0853	27.3585	35.665	38.2388	34.1092	30.5098	35.4341	36.3459	28.4395	30.5679	26.0634	29.5276	30.673	32.0681	27.8702	25.5791	29.3165	30.9724	28.3391	27.0926	26.5023	27.2334	28.2855	24.0462	25.9574	27.4446	22.7023	25.652	28.1101	26.2383	22.6137	21.46	20.4362	21.4905	30.4707	24.7437	24.0805
An05g00730	JGI_159795	3605	4204.1	915.03	1040.19	85.6521	125.195	18.2744	18.8293	24.4935	25.2498	32.6702	16.2711	16.752	21.7484	20.3588	21.2368	23.3257	21.3619	22.4137	19.9316	24.5016	207.187	289.794	122.309	240.49	126.821	650.858	19.1652	25.3063	359.182	310.777	270.014	245.296	365.397	110.886	247.113	382.302	427.921	499.024	33.5591	33.9407	385.248	449.559	182.745	198.306	511.503	587.61	388.319
An05g01290	JGI_159849	110.9	89.3095	75.8263	77.4635	100.238	81.9668	133.553	148.587	179.064	176.7	160.197	180.21	105.57	329.68	307.58	177.326	164.186	237.645	244.07	605.53	166.675	263.402	142.019	663.148	682.189	211.093	156.726	111.035	166.126	150.194	165.365	189.775	82.535	398.337	196.392	98.3081	82.599	98.6686	93.0146	119.467	134.499	48.3054	48.8422	44.0516	49.779	41.8867	48.8148	64.4829
An05g02010	JGI_159914	70.1736	69.6749	67.1321	50.2028	35.3654	39.8885	34.9143	35.1555	41.0294	37.9691	43.2582	26.9582	24.2856	30.3745	34.9428	31.2345	37.62	48.2749	31.4722	37.7147	32.3238	76.5889	64.0836	37.3556	67.6121	61.8267	74.1788	38.65	33.72	52.0376	45.4336	50.154	51.7924	40.4208	37.2951	63.2877	53.7006	53.3904	44.9537	37.3831	29.1468	76.3395	63.0832	68.7865	67.3251	51.4404	49.0843	52.911
An05g02510	JGI_159964	26.7121	31.044	36.2686	29.6737	35.4875	34.6984	26.2554	29.6313	22.1414	23.7732	25.2473	21.2793	23.9276	25.3161	30.1533	33.9217	36.3398	32.5725	34.6511	32.0186	31.5778	30.6243	41.2999	29.0343	28.72	40.6715	29.3556	24.5709	34.6138	30.7963	28.142	27.6458	30.7636	27.7587	27.5891	31.1011	35.6337	36.2368	38.8929	25.0303	26.7428	24.4597	24.209	28.7522	22.3187	35.1116	35.9134	34.8884
An06g00260	JGI_159999	1925.74	886.924	571.317	380.137	758.821	430.62	53.1548	48.4939	92.0884	51.3088	118.12	35.8671	23.4857	32.7098	37.6397	76.6443	79.3043	52.2927	51.4099	65.9597	49.8507	1508.86	1941.53	552.93	1114.23	616.169	1325.1	47.7673	65.3921	338.478	281.226	879.713	888.808	244.222	172.579	502.554	290.347	1249.46	686.709	40.4218	43.7294	1040.28	1194.25	1319.47	1286.34	1239.15	1250.19	553.423
An06g00560	JGI_160028	29.0671	29.6158	26.5348	31.0487	32.3511	37.0461	2964.88	2735.07	464.388	739.939	545.125	32.8545	31.2619	33.2208	29.9423	34.0785	41.1357	32.2545	29.0554	31.0269	39.163	51.1907	56.0674	661.03	735.853	200.234	579.953	35.8865	39.9536	370.454	217.08	27.3312	27.5194	56.0714	29.2213	63.6994	45.2756	27.4806	28.5738	27.1495	28.2033	46.7253	47.5981	99.887	109.081	29.9634	32.5332	81.6448
An06g00620	JGI_160034	183.735	211.586	605.14	763.561	78.4223	144.017	35.1099	30.382	222.93	247.409	293.423	46.8143	26.2095	24.7216	26.012	35.7024	45.4854	31.7664	32.8561	29.953	29.5177	160.143	181.055	422.934	411.904	164.524	397.682	89.6524	67.2431	1110.05	1081.5	103.3	95.5657	501.175	313.396	968.622	805.529	1005.59	868.077	22.3263	19.0094	189.614	193.416	386.996	449.598	146.765	211.322	296.132
An06g02030	JGI_160169	19.0402	17.3651	18.2617	17.5646	23.402	18.6123	15.937	19.4611	19.083	21.6489	20.5739	23.096	18.1427	21.3559	22.1784	19.8317	21.1543	20.9398	17.8731	16.766	23.0296	19.5862	22.5271	20.5121	20.8843	17.9032	17.4929	18.1558	23.5419	21.5373	25.6051	21.8035	21.5289	21.8752	18.96	18.3805	19.8959	19.5864	18.8814	20.5576	18.9713	18.8546	18.1065	17.2883	17.8667	17.7763	20.2919	16.696
An06g02270	JGI_160194	2941.49	3016.26	4581.58	3926.46	4040.09	2451.27	1821.55	1743.88	2002.54	806.576	1656.12	2542.39	2693.6	1929.76	2124.22	3795.84	3760.38	2954.06	2981.02	4699.95	4263.52	4058.01	4402.05	6148.94	6415.03	5276.12	4576	5004.15	5740.57	345.089	403.627	872.591	913.633	5740.79	2653.15	1775.13	1057.78	2716.11	3021.53	1703.3	1532.97	7307.58	7224.43	844.748	1034.4	2921.66	3329.55	4198.67
An07g00230	JGI_160261	579.984	782.557	15.8985	13.6742	14.679	12.8227	12.359	13.7017	13.3538	13.8823	11.8132	14.1096	13.393	18.9033	19.6323	15.9522	14.4309	18.4056	16.6356	16.0818	14.6916	13.012	14.4802	13.7435	11.9703	13.0795	11.9578	16.3218	15.56	14.3772	14.75	14.7584	13.5453	91.3097	30.6323	16.9596	14.7152	12.8072	16.7487	13.178	15.1932	11.886	10.4182	11.1834	10.7232	12.5115	12.6022	18.5298
An07g01260	JGI_160360	28.6628	46.9191	24.9906	25.9586	58.0242	49.8307	30.3922	30.9409	30.1946	31.9624	34.0013	21.2893	18.6403	26.425	25.149	24.1557	21.2565	25.1765	23.7816	19.4405	20.4158	40.757	33.3789	20.7671	22.4893	27.8649	30.058	26.4814	34.3106	23.7885	23.5231	24.8851	28.164	34.1542	20.8117	22.2111	24.4017	29.9219	23.6707	42.8021	36.9666	25.2071	30.364	24.8969	25.3071	31.1443	31.5819	158.208
An07g01310	JGI_160365	105.164	96.126	75.0832	63.1694	2342.05	1716.96	191.227	160.863	51.5915	63.9119	53.2962	47.7237	40.6525	49.94	50.8126	58.5969	48.7518	45.2837	45.0262	56.4966	59.3273	129.255	130.662	119.737	80.6466	159.764	102.837	41.6796	43.3725	55.4944	63.9445	55.5179	62.2275	53.8843	37.8453	46.2209	64.0109	521.292	439.686	45.9656	41.2285	75.1852	124.725	76.2289	83.6115	63.413	57.8791	626.278
An07g02060	JGI_160437	206.094	182.696	161.62	142.06	48.8784	63.4218	55.7468	45.2045	56.7095	56.0081	55.9409	34.1758	23.7814	24.3623	22.4598	32.33	24.642	31.5966	30.8872	22.7294	25.5431	130.95	167.031	68.8866	89.7509	166.164	208.652	25.7084	33.2934	159.545	157.06	144.75	192.994	57.2144	26.0495	106.24	154.882	179.085	149.13	51.7972	39.9724	181.734	219.786	205.745	182.73	105.084	128.251	85.6502
An07g04430	JGI_160670	2025.81	1605.22	499.919	720.191	1277.63	815.52	827.148	854.457	826.962	1046.83	1469.48	151.84	108.556	41.104	40.7062	1112.36	1019.84	152.818	164.081	213.7	155.78	880.392	688.167	3702.91	4595.06	2117.58	1338.5	193.035	1303.07	315.26	289.284	118.013	123.494	1690.91	2184.91	655.106	176.793	365.278	205.112	28.1123	59.4295	2687.22	2264.84	1020.64	1349.4	506.287	856.231	1120.95
An07g06300	JGI_160853	38.1568	25.7069	19.4049	19.5008	31.314	17.9884	32.514	30.6185	23.3416	24.1782	25.3836	43.4589	46.5023	34.5981	30.0692	38.6854	39.1414	30.0221	37.4286	28.8257	54.4257	14.3054	16.5742	16.9108	15.8085	16.2142	13.1748	17.3971	16.2853	20.0761	20.1251	15.3574	20.618	17.6547	20.9951	17.3895	14.5353	15.0962	15.8212	16.365	18.4061	15.6312	16.3585	16.3747	16.9069	27.2101	32.415	20.393
An07g06880	JGI_160909	2332.36	2873.08	1647.66	1445.55	216.678	204.602	1913.68	1822.74	3602.11	3499.61	3395.76	40.8667	51.7696	54.9401	41.547	128.108	135.475	91.543	95.8676	376.216	155.672	736.232	961.528	1960.76	2529.82	666.805	1294.45	226.149	470.904	2293.29	2042.71	671.716	518.657	1513.97	510.098	1466.57	4171.91	3475.03	2479.28	440.96	568.463	467.31	443.135	427.874	498.116	1135.62	1237.88	1126.67
An07g10370	JGI_161257	527.074	554.726	447.839	398.623	492.613	572.224	461.729	416.499	479.697	470.928	484.694	279.281	262.833	218.559	225.337	314.556	348.669	247.262	317.152	376.887	348.63	735.177	863.926	454.923	423.523	471.286	769.214	427.178	355.474	499.679	503.547	1393.3	1417.69	305.068	314.097	523.604	801.22	969.726	886.085	1054.54	1001.59	742.727	819.893	846.678	851.833	481.878	583.914	672.001
An08g01720	JGI_161436	39.327	87.6676	3813.72	3829.92	24.6571	45.2238	529.739	518.189	5579.1	6342.23	5760.26	21.3466	17.8543	26.5206	24.3713	27.2781	27.9686	24.7128	22.7778	23.8172	27.5863	113.565	162.681	235.992	365.262	109.138	317.795	554.042	167.326	9889.75	8834.07	222.161	266.681	1661.83	678.418	6974.08	11161.1	9220.21	8023.28	149.796	160.731	32.2377	43.3613	430.181	631.512	71.0536	66.3547	157.557
An08g03850	JGI_161647	43.3427	83.5513	62.5785	92.7789	43.3385	122.215	42.5059	39.5734	39.8226	37.7306	37.373	21.5974	23.2538	29.6376	27.5846	111.319	105.634	47.8027	48.3332	40.3771	46.3377	107.522	80.8606	169.477	196.428	266.641	201.109	26.2153	34.8841	42.5189	45.6886	58.5824	98.8666	41.4674	46.7476	43.8647	33.9168	39.3282	37.4692	33.3406	38.6665	41.2231	31.6586	37.4758	36.7405	71.5524	54.0559	81.8121
An08g04040	JGI_161665	173.199	315.729	6749.09	6560.53	297.535	173.131	80.5667	64.9403	187.859	101.997	172.21	45.5113	46.439	54.139	56.642	71.3757	95.5718	55.5131	58.4539	47.9505	49.3762	510.828	545.489	438.695	745.26	533.86	917.945	173.408	116.023	4765.56	5024.26	634.489	856.106	1121.57	856.301	846.331	2113.85	5081.31	4722.17	937.766	1054.97	308.369	383.614	982.536	1597.04	472.759	586.259	805.02
An08g08000	JGI_162060	34.1602	37.3804	27.6081	22.2218	32.9177	21.7395	23.4138	20.7053	25.2168	29.9849	26.4783	20.875	20.8716	15.3053	19.2639	19.366	19.1467	29.1805	25.1686	35.0012	20.5728	22.6121	22.791	43.275	61.021	22.0929	23.9524	22.9979	20.9151	22.3078	26.5619	33.7361	28.4731	23.2161	26.7704	26.2628	27.8549	23.1762	25.4582	28.9171	25.0604	23.5573	29.4718	25.3829	25.1913	26.7641	23.2374	35.5585
An08g08520	JGI_162110	14.8562	16.3931	13.7851	12.4806	19.8329	13.9761	14.7582	17.5188	14.6429	13.4905	14.9744	16.8482	25.4963	13.9601	14.8042	17.2827	19.5995	18.129	16.188	19.7007	21.0951	16.5677	15.3887	14.2156	15.3457	19.7415	12.7572	14.4425	14.4579	16.0396	15.0972	13.6194	18.0001	16.4052	15.1564	16.395	16.5644	14.8186	17.525	16.7921	17.4452	13.5066	13.0101	15.2351	13.7766	16.6246	14.2063	15.9252
An08g09350	JGI_162191	96.7453	34.8492	86.0215	89.6926	41.3873	34.323	24.5728	22.4821	41.8283	30.5869	38.9336	18.5646	19.9525	28.3616	28.9745	28.4049	25.3187	32.5897	31.903	25.8933	26.2489	110.704	148.855	31.2257	39.0737	66.2416	145.9	23.8557	27.8465	62.0123	56.2236	122.47	68.3311	46.8098	31.2177	53.5979	79.5867	137.558	157.166	23.7829	27.3708	41.3627	52.9887	38.2107	47.1016	45.4237	49.4356	62.2677
An09g02930	JGI_162753	128.795	88.9079	134.742	275.148	95.1219	227.004	244.844	197.599	73.217	51.4194	104.37	663.61	650.226	70.9188	73.8757	556.431	478.304	271.053	252.038	153.53	220.48	2092.39	2031.33	1330.04	2029.34	1434.85	2219.75	65.475	237.413	120.858	99.9921	120.87	76.609	112.292	49.3345	262.918	95.2292	371.166	301.738	57.7668	69.3654	1179.61	1187.05	2283.17	2403.22	930.825	1034.4	386.185
An09g04680	JGI_162927	105.284	171.044	154.38	225.543	78.9279	123.096	175.948	167.083	303.23	326.478	325.903	221.4	189.363	102.687	91.6218	146.765	150.589	164.932	156.171	107.978	108.217	174.228	151.308	178.051	170.096	158.235	148.446	143.062	144.003	129.306	106.977	82.0563	122.719	98.1652	174.968	199.846	168.179	187.312	225.029	85.0847	97.1945	140.361	102.648	215.894	186.484	104.885	132.343	108.073
An09g04810	JGI_162940	25.3818	23.4727	18.0344	20.2866	22.7597	28.243	18.0964	17.0075	61.2756	69.7019	95.2482	72.0177	53.2975	342.812	356.521	21.6733	23.7682	26.0864	26.8264	20.366	22.1776	74.1083	15.9697	33.3874	29.4957	30.6676	20.722	30.5719	36.8826	27.8292	28.3269	18.0604	23.1738	27.627	21.6497	22.1286	26.0287	22.1848	21.5214	16.1833	20.4203	16.2505	21.0503	21.7808	24.2909	20.6437	27.4666	121.479
An11g00120	JGI_163265	59.0757	39.1598	61.221	53.5062	85.2306	80.6024	68.08	65.3548	46.4905	45.8208	44.0536	26.7085	24.6833	33.9955	31.7791	31.9329	30.1634	32.5956	33.6766	39.9803	34.3616	75.0036	79.1473	66.5131	44.6191	100.334	74.0677	45.4971	37.8721	47.8001	51.916	163.112	101.705	61.1377	71.2826	38.2309	55.501	82.8382	64.7075	38.9328	42.3488	54.2624	72.6022	68.9638	62.7308	85.8877	91.1604	304.883
An11g01100	JGI_163366	156.88	126.311	249.381	199.179	259.105	186.663	618.911	659.032	1178.5	841.922	1401.97	140.874	141.39	358.358	482.725	596.432	552.937	589.975	580.433	842.956	974.446	253.498	270.32	777.719	1300.24	566.536	340.827	371.977	334.612	172.134	148.306	85.5863	85.8889	143.945	94.5703	179.446	220.117	107.641	140.202	60.0516	49.8941	105.672	83.2433	87.7247	90.6749	169.072	154.601	143.275
An11g03700	JGI_163617	109.876	133.046	187.77	193.553	66.2309	90.2895	113.508	106.819	67.4742	91.8284	70.4017	87.6157	114.162	73.6075	81.5489	93.6361	105.162	85.6064	78.1624	123.638	137.26	134.906	180.051	81.5917	88.4624	89.0963	133.04	76.5441	64.4626	119.171	124.554	175.312	268.51	77.5857	80.0906	137.177	188.741	230.049	297.414	149.994	146.303	224.547	208.118	321.527	286.269	156.228	223.49	90.8579
An11g05280	JGI_163766	264.679	197.255	100.378	131.042	73.6439	95.2452	63.9983	72.386	132.656	165.416	149.233	70.6163	59.4751	87.5788	70.4916	87.4775	78.5989	81.0835	83.922	77.9765	78.2219	161.682	201.446	95.1364	113.575	135.083	144.649	90.918	74.4199	193.636	171.656	313.492	149.579	1276.65	236.236	146.531	123.168	207.896	194.843	81.3155	83.3972	134.563	197.891	164.282	188.349	98.9077	125.57	102.979
An11g09600	JGI_164167	354.503	478.881	1227.87	1252.53	73.0541	114.293	693.736	735.946	368.124	719.934	478.213	67.1169	43.798	33.8671	34.864	103.231	112.019	114.144	127.747	110.39	67.443	453.807	367.276	456	802.299	965.14	1317.48	54.5522	52.9557	494.358	522.678	252.717	270.345	165.577	52.9363	477.636	288.284	205.702	240.618	235.572	152.097	208.919	235.86	138.602	148.17	147.545	122.367	157.017
An12g01560	JGI_164492	32.3132	34.7872	28.5728	29.9155	36.052	36.4432	27.6686	26.0308	29.5808	30.6901	29.9344	34.4069	32.1149	44.0068	38.4973	36.5241	31.4356	43.9993	28.8412	37.0002	39.5349	33.7136	38.3542	35.8534	32.5796	34.0649	28.9044	42.6539	41.0806	35.6815	29.8804	30.7361	37.6058	29.8759	35.5577	33.4458	36.8704	28.8081	35.4682	35.2118	38.9609	28.3793	27.1949	23.6421	24.0242	28.119	24.2661	24.2182
An12g05820	JGI_164896	34.9909	32.8055	28.3148	21.5646	16.7861	19.4332	15.9557	15.0984	16.4175	17.5412	17.5751	20.2717	17.8262	14.2293	14.1481	14.0601	13.9484	15.0617	13.4025	16.8565	15.0871	33.1494	78.5651	24.7271	22.5497	37.1574	98.9252	15.5507	15.0528	22.607	21.0842	34.7303	33.7131	20.5357	14.1115	22.5496	30.7721	47.2955	57.8846	19.6719	19.0216	171.514	151.237	130.461	147.419	88.25	79.4999	35.9114
An12g07450	JGI_165043	9664.7	10328.8	9276.24	10070.1	7489.95	9168.71	5169.71	5377.38	9280.14	7899.79	8952.16	248.617	227.8	2410.2	2879.83	1005.19	1093.23	1114.04	1229.92	2130.82	3981.11	6648.95	7522.79	3156.74	4106.53	4786.23	7225.44	1990.92	3525.3	6673.73	6379.34	13090	12247.2	9119.5	9610.6	8351.44	11325.3	12028.4	12054.3	10432.7	10455.2	7548.5	6376.81	10322.5	9957.35	7837.88	8991.11	10079.1
An12g09270	JGI_165228	857.038	916.652	568.254	783.802	780.352	879.981	73.1697	64.3442	156.157	172.686	122.825	20.2748	16.3511	16.9855	17.3911	45.4961	54.4096	24.4514	32.4797	38.7358	17.1261	410.043	420.206	119.1	192.511	174.445	304.157	83.3172	64.5902	701.746	839.187	1188.76	3048.37	1065	1994.03	345.781	486.842	948.794	1192.99	214.353	128.768	614.522	876.482	707.382	716.17	394.068	743.073	2774.27
An12g09370	JGI_165238	373.766	425.17	409.909	353.163	74.7163	107.998	105.826	98.2796	109.157	104.312	104.603	41.4595	34.4346	53.3115	53.3537	74.3706	62.54	63.5798	77.59	56.1883	74.4664	588.448	760.533	100.561	103.525	407.894	623.944	46.5515	55.9182	143.216	138.529	438.561	320.523	702.793	277.791	110.844	147.929	257.319	272.757	313.449	390.11	445.547	363.804	336.687	271.991	234.604	223.588	80.0754
An13g02590	JGI_165645	475.96	159.462	80.4188	97.018	37.4095	76.7947	1483.9	1297.75	50.4915	67.1406	65.6112	100.619	447.124	622.542	470.158	740.968	928.337	267.428	301.041	77.3856	744.119	177.753	48.57	60.2573	57.7304	51.9901	43.2205	33.9526	37.3616	49.2776	61.5472	45.2354	45.931	76.9197	61.8703	43.3758	42.1413	33.4524	45.0063	35.6564	44.2478	293.064	111.258	82.6284	75.9682	172.514	234.258	165.584
An13g03250	JGI_165710	13.8948	18.9837	20.6074	19.4874	18.1847	17.9918	16.4205	17.787	16.4629	16.432	15.3201	16.6488	15.7112	21.2319	22.4264	23.1071	23.1514	20.7007	23.2906	15.3063	18.8773	38.8916	34.1437	20.2718	23.4209	24.5511	33.1761	19.8788	22.3352	23.2466	18.3328	20.2415	20.1302	18.3159	18.4517	18.8283	20.4204	22.8347	23.4873	17.6344	20.5675	21.0714	21.8968	15.4503	17.9007	42.6194	37.4597	24.6729
An14g01350	JGI_165921	13.6246	17.4728	13.442	13.3098	12.5422	14.6989	12.7707	13.785	12.9102	13.2013	13.5476	13.7418	12.567	14.5648	15.2668	14.4342	13.9565	15.1284	12.9046	14.8402	13.2601	12.8494	19.3458	14.4355	16.7518	20.0474	11.2429	13.974	16.8101	13.4194	14.5659	12.9945	15.545	13.4733	14.6962	14.6662	14.003	14.67	13.3605	13.6605	15.178	13.2448	11.9891	12.957	12.9726	13.231	13.2295	14.2052
An14g01600	JGI_165946	1844.52	1658.24	800.786	1041.65	24.622	55.8885	24.223	27.4623	28.9401	26.1079	28.5849	16.8998	20.7219	34.3445	35.4927	31.5569	42.4739	37.4326	31.9482	26.9458	33.1809	95.8914	96.7976	52.1498	68.2206	41.8122	85.7304	54.646	37.2997	2409.59	2170.07	62.2595	44.2995	92.4967	40.664	228.611	250.738	698.315	998.339	22.2055	27.986	57.2597	65.0179	97.0586	94.6701	218.572	268.748	130.15
An14g02700	JGI_166055	14.2643	17.7877	18.6371	19.3868	15.0417	14.9851	13.4246	13.7373	13.7233	13.0108	13.7074	13.6754	14.0315	14.4465	14.9379	16.4634	17.423	13.6489	15.0544	14.061	14.278	12.0251	14.0312	13.3995	15.9447	19.8421	13.8915	13.9754	18.4571	14.1291	18.4001	55.1122	42.2853	13.988	15.8423	17.0966	111.723	14.8104	18.8759	333.383	296.991	17.9242	15.3347	15.1244	14.2612	13.4186	14.0397	13.9372
An14g02740	JGI_166059	22.9751	50.8981	701.312	605.535	45.2503	35.2726	28.8837	26.887	29.0516	25.7743	24.3458	17.4991	16.9705	18.9767	19.3086	17.077	18.2164	21.1702	17.6421	54.5635	47.4668	519.217	696.333	16.629	16.0758	611.909	946.944	16.6581	19.8126	22.6304	23.847	710.109	243.263	18.7726	22.5618	71.5673	440.738	102.698	218.125	390.468	367.352	34.9877	19.1847	126.147	45.248	13.4275	14.0478	16.9686
An14g02880	JGI_166072	36.1679	44.4259	45.8335	42.7753	64.2294	46.2319	42.1501	36.5123	44.88	39.1607	44.0054	44.3327	49.2359	46.3779	44.9528	41.3202	47.7254	60.1845	48.7028	51.8313	50.4081	63.0075	59.5214	49.1934	49.953	78.4223	63.7477	45.0141	42.0223	40.0855	45.1536	36.1182	50.2664	48.0356	54.3455	84.025	71.7982	37.689	44.9355	46.3606	54.8445	47.3182	37.4685	43.0659	40.6313	51.8964	41.8187	40.7427
An14g03990	JGI_166182	31.499	36.5057	40.9558	70.2439	58.1454	60.3976	49.7492	48.2756	462.193	504.182	458.334	1004.5	853.263	41.0939	43.0843	65.0026	62.6709	385.92	380.5	67.3289	67.0556	461.239	74.3929	103.097	44.7152	116.988	73.7002	441.378	436.199	34.2474	36.2544	38.5941	38.8543	112.676	115.474	35.6509	36.3072	28.0592	38.7771	64.4607	55.1026	53.805	38.4237	44.3027	42.3462	39.5851	34.6321	51.8222
An14g04280	JGI_166211	115.781	114.014	7308.37	6800.99	74.6881	63.2742	193.605	188.974	301.57	181.443	423.287	32.4593	29.4929	31.4372	32.4761	50.0774	52.169	27.2977	26.2289	66.4583	38.4541	145.839	181.384	1144.06	1285.12	247.15	410.254	133.594	240.592	5577.56	4161.45	132.44	117.583	778.379	136.114	284.183	610.58	3349.42	2741.07	496.638	518.017	101.227	90.1128	556.109	966.944	132.979	139.135	210.935
An14g06260	JGI_166408	56.3439	66.6515	71.9768	68.3366	70.2608	57.8131	65.9766	60.8014	54.1526	60.6226	56.5397	61.5958	57.6491	64.4757	62.2639	67.6547	63.3376	72.99	83.1475	53.2325	54.8462	91.6834	89.4015	77.4014	75.3816	102.795	68.0108	56.5033	72.6768	57.8361	63.5722	79.2381	118.08	55.4036	77.5327	74.0965	67.4317	91.8474	76.5222	79.1165	82.0939	59.2263	69.0388	85.8704	59.3023	50.5528	60.8422	65.1052
An14g06890	JGI_166471	54.5236	62.0411	39.3529	44.0788	41.1365	40.3188	38.6036	37.5086	43.453	44.0273	39.6765	38.5072	33.757	42.1435	39.6248	36.126	41.0277	44.447	45.9681	41.3209	45.8222	37.8735	31.1467	39.409	33.0413	40.0039	34.3992	39.9913	55.3134	45.9859	36.7192	41.2576	54.6324	45.6871	49.6109	46.0115	45.7903	39.5794	54.7894	48.7116	42.8721	39.7857	34.2731	32.626	30.1468	34.4076	32.6839	32.6164
An15g00310	JGI_166554	286.845	118.666	156.031	138.062	126.011	81.9583	26.6551	27.2581	101.158	79.9667	84.0601	329.358	409.539	76.5458	80.3632	73.9472	56.39	58.4939	60.5559	74.3337	91.9038	94.5011	115.799	88.5877	87.3168	172.883	171.334	398.428	433.186	84.076	83.3639	101.223	97.4685	907.963	655.115	677.345	320.964	297.686	230.423	35.4228	37.5563	2329.23	2332.16	188.079	280.213	111.56	95.1116	77.3487
An15g01500	JGI_166674	141.341	116.79	57.1799	58.7053	268.392	102.387	36.1743	31.4782	52.7645	53.2671	97.5816	273.581	167.792	33.7725	34.2692	227.109	255.151	112.888	114.417	54.336	92.4646	128.584	130.853	952.974	965.452	138.5	143.908	78.9514	158.313	50.8363	64.1636	36.3902	30.5219	875.716	380.174	50.5269	36.1583	64.5437	48.4668	25.5146	28.4473	247.468	346.902	128.517	171.376	122.27	224.31	656.483
An15g03940	JGI_166914	1454.15	1258.7	2115.28	2207.37	8453.32	5954.73	3432.79	3416.18	3236.89	1859.26	3096.81	3676.77	3049.9	4400.71	4627.03	4975.98	4657.19	3411.71	3420.01	4464.21	4745.91	5049.83	5342.13	5705.11	8111.86	4482.15	4516.54	5432.65	7514.39	516.034	646.23	1912.18	1473.08	6871.16	8251.5	1480.86	1928.34	3567.9	2669.76	3146.31	4314.86	6747.52	6095.39	1261.47	1342.03	6528.63	7748.52	12953
An15g04270	JGI_166946	14.1824	14.9576	15.4466	14.7105	11.5971	15.5131	11.845	11.7157	11.2691	11.8428	10.7625	13.4571	12.2371	12.4499	12.8847	12.5223	12.3251	11.7479	13.9534	12.4357	13.51	13.9473	11.7472	15.0269	16.3401	15.0001	11.8027	13.1844	14.6235	12.7823	12.6606	13.5037	13.6344	13.3792	11.6114	12.9621	12.8039	13.1125	14.7691	12.279	12.4815	14.8858	11.6921	11.349	12.0533	14.4467	14.3763	15.9832
An15g05440	JGI_167057	195.904	213.356	100.924	105.278	65.7153	94.8595	82.9328	80.0527	146.923	241.064	115.789	46.9577	43.3344	72.0176	68.724	66.8753	71.0934	70.2384	80.266	42.318	48.0464	174.276	154.34	34.2407	46.7041	64.3516	85.3644	58.7144	74.0391	256.028	227.489	353.759	377.656	560.943	232.875	101.026	56.6864	143.404	113.92	56.8014	70.974	132.546	137.862	171.484	191.347	65.2209	78.1285	56.6578
An16g01600	JGI_167458	343.637	353.285	427.406	559.612	181.607	270.221	195.987	208.843	261.892	254.733	193.253	43.1235	36.9279	41.3393	45.715	166.092	143.065	93.9249	114.044	169.373	286.777	307.159	279.697	105.185	73.1268	176.125	216.482	32.5523	40.0386	290.025	304.111	556.001	422.628	104.281	72.2502	374.847	536.565	394.74	544.971	196.037	147.906	186.01	214.649	286.986	236.063	440.952	435.899	376.064
An16g05750	JGI_167868	15.3701	18.2147	17.3526	17.558	18.0492	16.5373	13.4782	13.842	14.5806	13.411	13.8897	16.7388	17.7702	15.5231	18.7112	18.9186	17.6128	17.4569	15.9345	15.3955	15.5363	14.5432	19.075	18.9766	16.1413	19.2535	19.0014	15.5595	19.3685	18.5956	19.4628	16.5059	19.9055	14.9114	15.6086	16.7504	15.2465	15.7113	17.2741	15.0462	16.3189	15.6238	15.7848	14.1402	16.0258	15.2669	13.6073	17.9764
An16g06220	JGI_167911	27.432	30.7588	28.3458	28.2324	28.117	29.1262	27.0769	30.311	30.3609	25.7689	32.0768	29.4805	29.1028	30.9915	27.5863	28.0373	31.1327	29.9639	28.1239	29.9775	26.7504	29.8102	34.026	34.4931	37.4036	37.2351	25.3332	31.436	32.6573	28.2411	28.2915	28.6338	30.2287	30.4141	30.0608	28.8567	27.5727	28.7799	30.686	29.6337	29.6066	28.5764	29.7373	26.896	27.2389	29.3706	32.5684	30.1762
An16g06580	JGI_167945	29.4959	25.5256	29.3353	27.0324	32.3214	28.8657	27.4087	27.361	33.393	27.8744	32.4718	26.1428	30.7342	104.198	115.686	29.0153	30.8087	29.5258	28.187	33.4053	33.8958	26.3198	28.7948	31.605	29.6357	32.2494	24.2201	28.9325	29.2247	27.7816	28.4386	26.7645	32.1762	33.0679	29.0815	31.1324	24.6193	25.0078	28.5667	29.9605	29.1458	22.8812	22.0155	23.917	18.2931	16.1225	25.5666	24.2575
An16g06610	JGI_167948	17.081	14.7487	16.1458	16.4378	16.724	18.403	17.2307	17.5336	16.4144	15.2386	16.4544	17.5142	15.9967	16.6344	16.4055	17.8714	17.8613	19.9596	16.3234	16.5917	16.1475	14.9868	18.6278	14.6507	14.9627	16.8014	15.2531	17.9252	17.0387	17.6635	14.7894	16.4848	15.0592	19.2563	16.4198	16.1085	16.3275	17.2082	18.5382	18.2803	21.0044	13.1212	14.4438	14.704	14.1475	14.1572	13.4902	15.9137
An18g00040	JGI_168460	56.1746	62.1138	56.7883	62.5752	56.2249	52.9597	36.3935	43.4284	53.6983	54.5679	62.3255	53.5121	55.0613	56.7818	58.6811	60.7275	60.4452	61.8151	53.0514	58.6344	57.2041	60.9779	76.3051	69.3761	60.566	70.5545	68.0296	55.5968	60.6081	69.6375	46.5788	66.7854	78.0106	54.4752	61.7594	56.6555	67.7086	53.1003	60.9546	57.6739	63.5	58.1939	56.9301	60.2267	56.6681	54.5537	53.8693	66.0474
An18g00440	JGI_168498	84.5301	86.8491	98.732	120.659	13.8018	17.3297	13.6851	13.8619	11.5245	11.7346	12.1114	12.2618	11.6573	11.179	12.6296	11.8	12.1825	11.7674	11.3578	11.2738	12.5837	22.0323	28.4402	12.7592	12.7395	17.5464	41.0673	12.0258	11.4757	24.8167	20.848	33.0925	20.8336	40.8923	18.4796	21.3701	14.9486	34.1227	34.7399	12.1289	11.8544	24.3971	20.0673	29.3122	27.7391	40.9776	32.1282	40.9704
An18g01700	JGI_168614	2657.11	3628.77	2032.61	2635.17	224.594	701.788	89.0356	89.0279	196.042	135.508	196.828	32.2312	38.5835	32.7536	44.3946	30.3129	41.2664	27.275	28.3125	24.5382	27.498	2484.6	3402.5	200.719	419.313	2275.68	4369.11	47.5274	70.1722	1206.44	1164.45	4626.13	4456.67	1843.46	677.34	428.102	1219.08	2940.77	2540.95	126.787	190.53	7278.7	7607.54	5143.61	4990.35	1504.02	956.765	425.415
An18g01760	JGI_168620	24.0572	24.7833	20.2757	20.736	23.3125	23.1045	19.6793	19.1863	24.1336	25.0185	26.0875	23.213	20.5177	22.8358	23.3257	22.9027	19.765	45.8636	55.1717	40.631	23.0416	21.3697	25.1931	26.0355	22.3247	26.4671	20.5007	27.4505	23.1959	27.0591	22.7997	21.7309	26.5253	25.2297	23.4295	26.2254	25.2042	19.7817	24.1753	23.194	25.1399	19.7453	18.2642	22.0243	21.3677	21.3211	20.0041	22.9472
[truncated: 7 more columns]
